# Supplementary material for: Development and understanding of cobaloxime activity through electrochemical molecular catalyst screening
Source: Royal Society of Chemistry journal article supplement (doi:10.1039/c4cp00453a), 2014-01-01
Supplement: c4cp00453a1.pdf [file c4cp00453a1.pdf]

## Electronic Supporting Information

### Development and Understanding of Cobaloxime Activity through Electrochemical Molecular Catalyst Screening

David W. Wakerley and Erwin Reisner\*

*Department of Chemistry, University of Cambridge, Lensfield Road, Cambridge CB2 1EW, UK.*

*E-mail: reisner@ch.cam.ac.uk*

#### Contents

|                       |         |
|-----------------------|---------|
| Supporting Table      | page S2 |
| Supporting Figures    | page S3 |
| Supporting References | page S8 |

**Table S1.** Crystal data, structure refinement details and selected bond lengths for [CoCl(dmgh)<sub>2</sub>(4-methoxypyridine)] (Compound **A**, see Figure 6 for atom labelling scheme).

| Parameter                                      | Value                                                                                           | Bond    | Length (Å) |
|------------------------------------------------|-------------------------------------------------------------------------------------------------|---------|------------|
| <i>Chemical Formula</i>                        | C <sub>32</sub> H <sub>52</sub> Cl <sub>2</sub> N <sub>10</sub> O <sub>11</sub> Co <sub>2</sub> | Co–N(1) | 1.963(1)   |
| <i>Fw</i> g mol <sup>-1</sup>                  | 941.60                                                                                          | Co–N(2) | 1.903(1)   |
| <i>Space group</i>                             | P2 <sub>1</sub> /n                                                                              | Co–N(3) | 1.905(1)   |
| <i>a</i> (Å)                                   | 8.0000(1)                                                                                       | Co–N(4) | 1.895(1)   |
| <i>b</i> (Å)                                   | 13.5322(2)                                                                                      | Co–N(5) | 1.885(1)   |
| <i>c</i> (Å)                                   | 19.2803(3)                                                                                      | Co–Cl   | 2.2302(4)  |
| $\alpha$ (°)                                   | 90                                                                                              |         |            |
| $\beta$ (°)                                    | 92.183(1)                                                                                       |         |            |
| $\gamma$ (°)                                   | 90                                                                                              |         |            |
| <i>V</i> (Å <sup>3</sup> )                     | 2085.72                                                                                         |         |            |
| <i>Z</i>                                       | 2                                                                                               |         |            |
| <i>d<sub>calcd</sub></i> (g cm <sup>-3</sup> ) | 1.499                                                                                           |         |            |
| $\mu$ (cm <sup>-1</sup> )                      | 9.91                                                                                            |         |            |
| <i>T</i> (K)                                   | 180                                                                                             |         |            |
| <i>R</i> 1                                     | 0.0387                                                                                          |         |            |
| <i>wR</i> 2                                    | 0.1164                                                                                          |         |            |

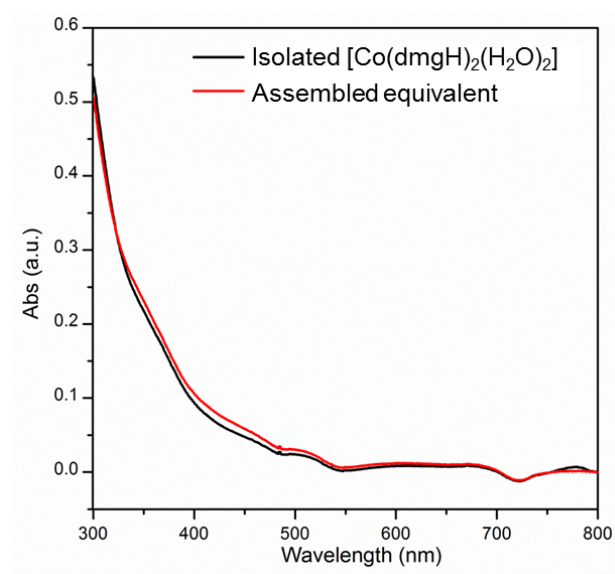

**Figure S1.** The *in situ* assembly of [Co(dmgh)<sub>2</sub>(H<sub>2</sub>O)<sub>2</sub>] was monitored *via* UV-vis spectroscopy by comparison to an authentic sample of [Co(dmgh)<sub>2</sub>(H<sub>2</sub>O)<sub>2</sub>] synthesised according to a published procedure.<sup>1</sup> The UV-vis spectra show dissolved [Co(dmgh)<sub>2</sub>(H<sub>2</sub>O)<sub>2</sub>] and the corresponding *in situ* assembled complex in H<sub>2</sub>O (0.08 mM).

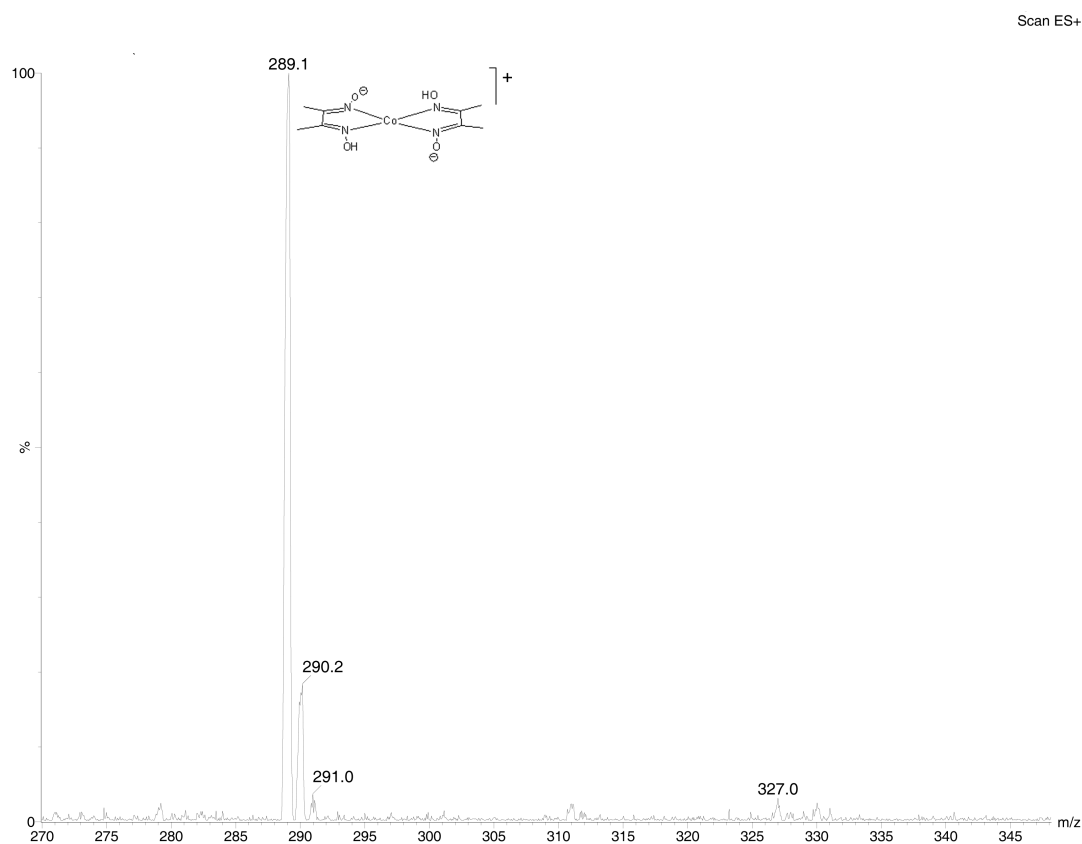

**Figure S2.** ESI-mass spectrum (+ve mode) of assembled [Co(dmgh)<sub>2</sub>(H<sub>2</sub>O)<sub>2</sub>] in H<sub>2</sub>O.

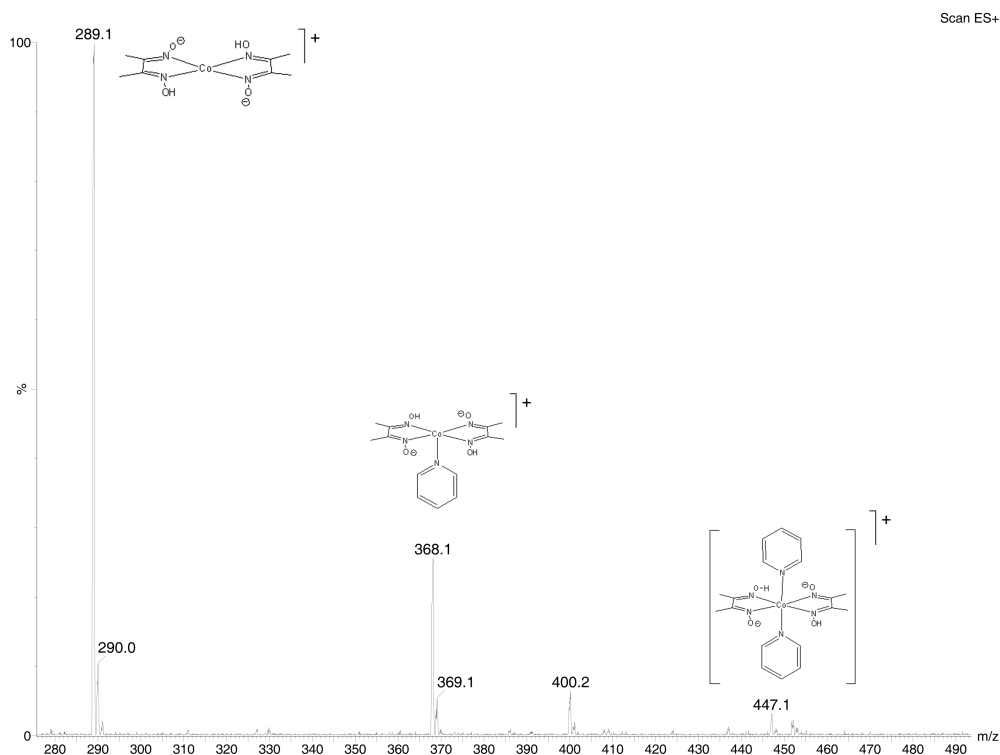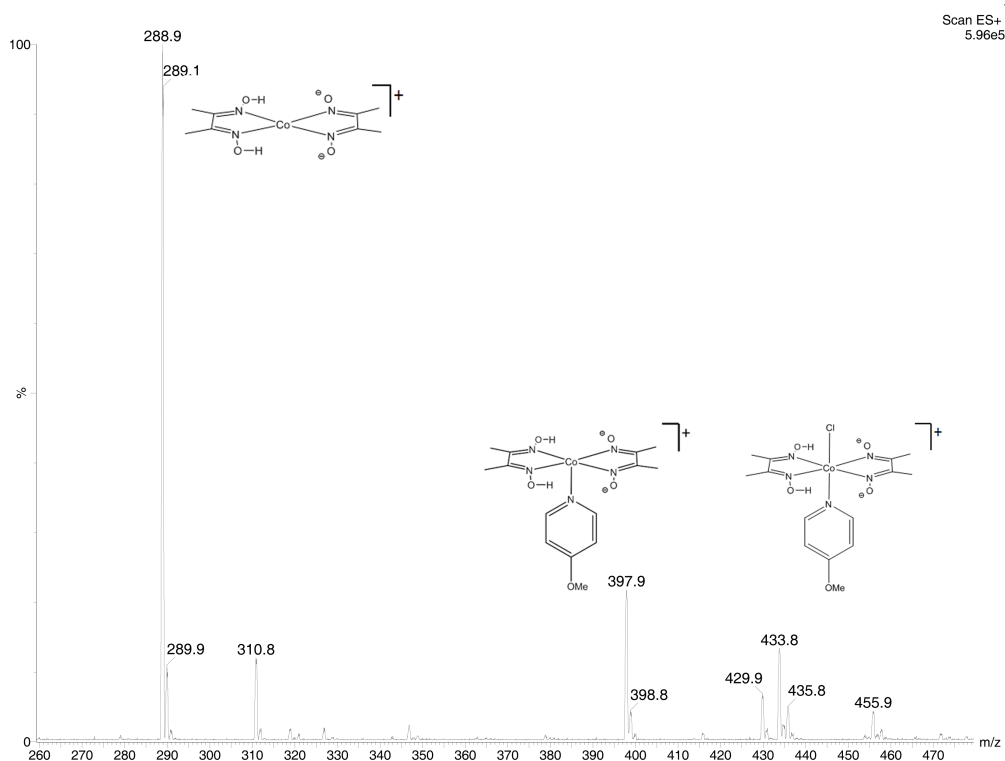

**Figure S3.** ESI-mass spectrum (+ve mode) of *in situ* assembled  $[\text{Co}(\text{dmgH})_2(\text{pyridine})_2]$  (4 equiv. pyridine added to  $[\text{Co}(\text{dmgH})_2(\text{H}_2\text{O})_2]$ ) in  $\text{H}_2\text{O}$  (top) and isolated  $[\text{CoCl}(\text{dmgH})_2(4\text{-methoxypyridine})]$  (bottom). Complex fragmentation is similar between the *in situ* assembled and isolated cobaloximes.



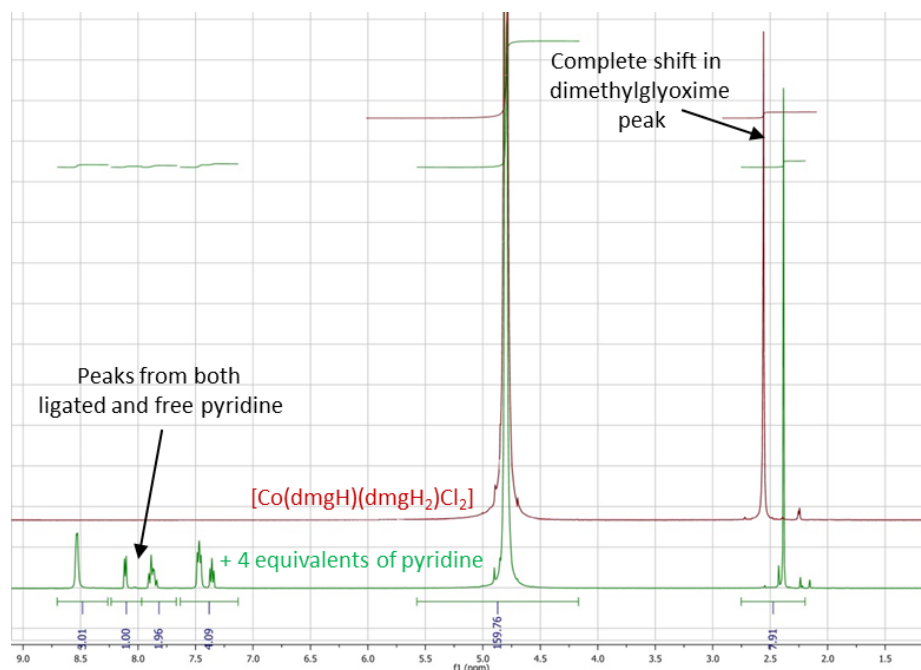

**Figure S4.**  $^1\text{H}$ -NMR of  $[\text{Co}^{\text{III}}\text{Cl}_2(\text{dmgH})(\text{dmgH}_2)]$  in  $\text{D}_2\text{O}$  (titrated with  $\text{NaOH}$  to pH 7) before and after addition of 4 equiv. of pyridine, showing complete substitution of axial ligands for pyridine.

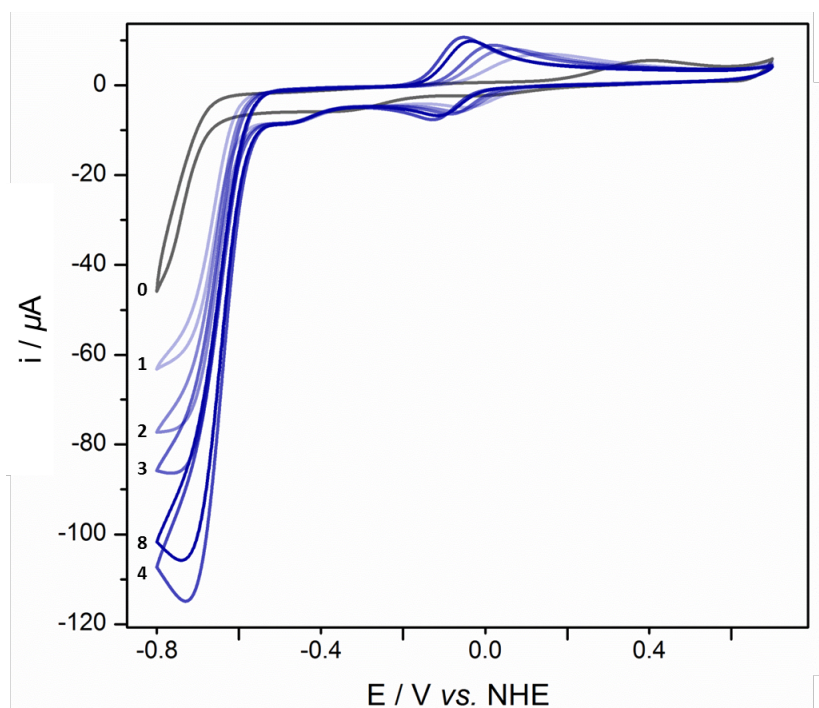

**Figure S5.** Addition of increasing amounts of pyridine to  $[\text{Co}(\text{dmgH})_2(\text{H}_2\text{O})_2]$  (2 mM) in  $\text{P}_i$  (0.1 M, pH 7) at  $100 \text{ mV s}^{-1}$ . The numbers left of the catalytic trace indicate the equivalents of pyridine added per Co complex. Enhancement of catalytic current stopped at approximately 4 equiv. of pyridine, after which a slow decrease in catalytic current was observed upon further addition of pyridine.

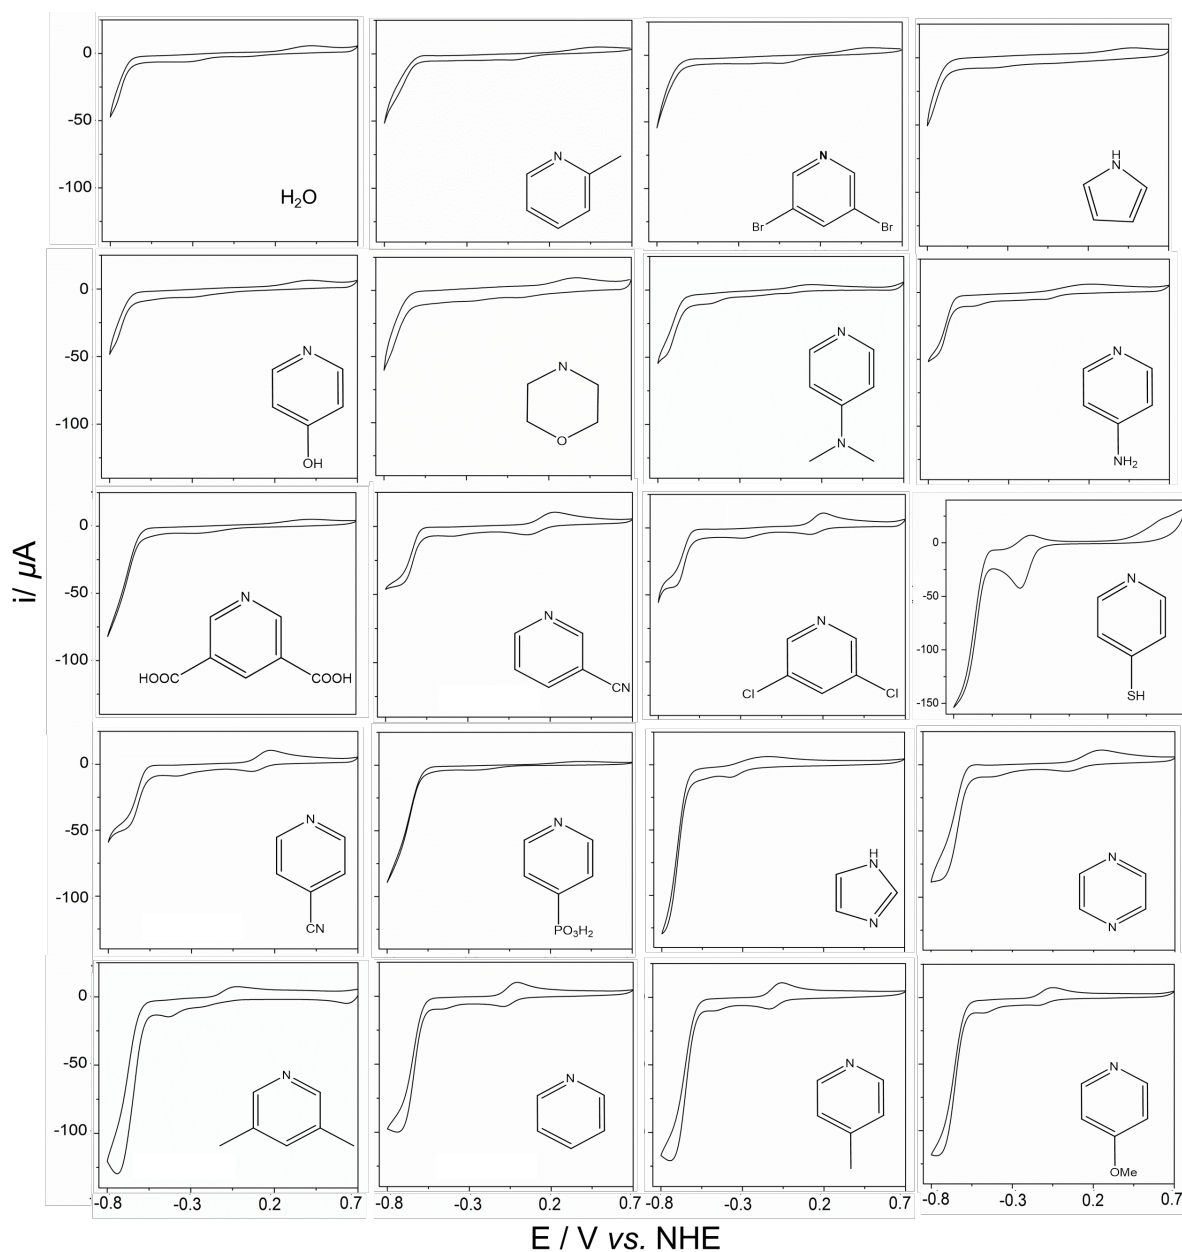

**Figure S6.** CVs of screened cobaloximes that arose after addition of 4 equiv. of respective axial ligand to  $[\text{Co}(\text{dmgH})_2(\text{H}_2\text{O})_2]$  (2 mM) in Pi (0.1 M, pH 7) at  $100 \text{ mV s}^{-1}$ . CVs shown are the second consecutive scan with the exception of 3,5-dimethylpyridine (first scan shown), which displays poor stability during catalysis.

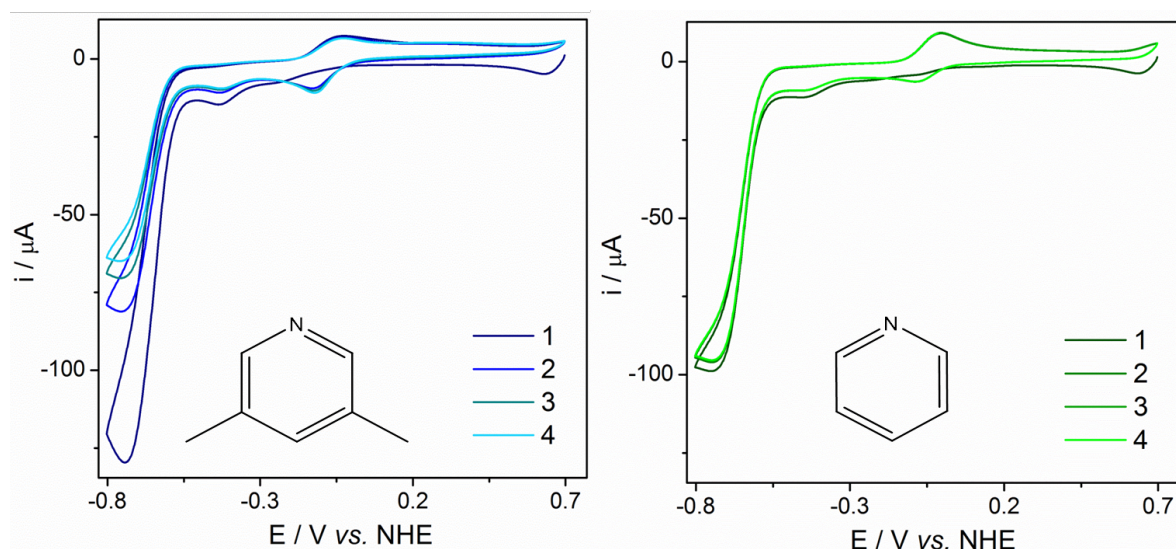

**Figure S7.** Consecutive CV scans of  $[\text{Co}(\text{dmgh})_2(\text{H}_2\text{O})_2]$  (2 mM) after addition of 4 equiv. of 3,5-dimethylpyridine (left) or pyridine (right) at  $100 \text{ mV s}^{-1}$  in  $\text{P}_i$  (0.1 M, pH 7), showing the fast decay of the catalytic current over time when using 3,5-dimethylpyridine.

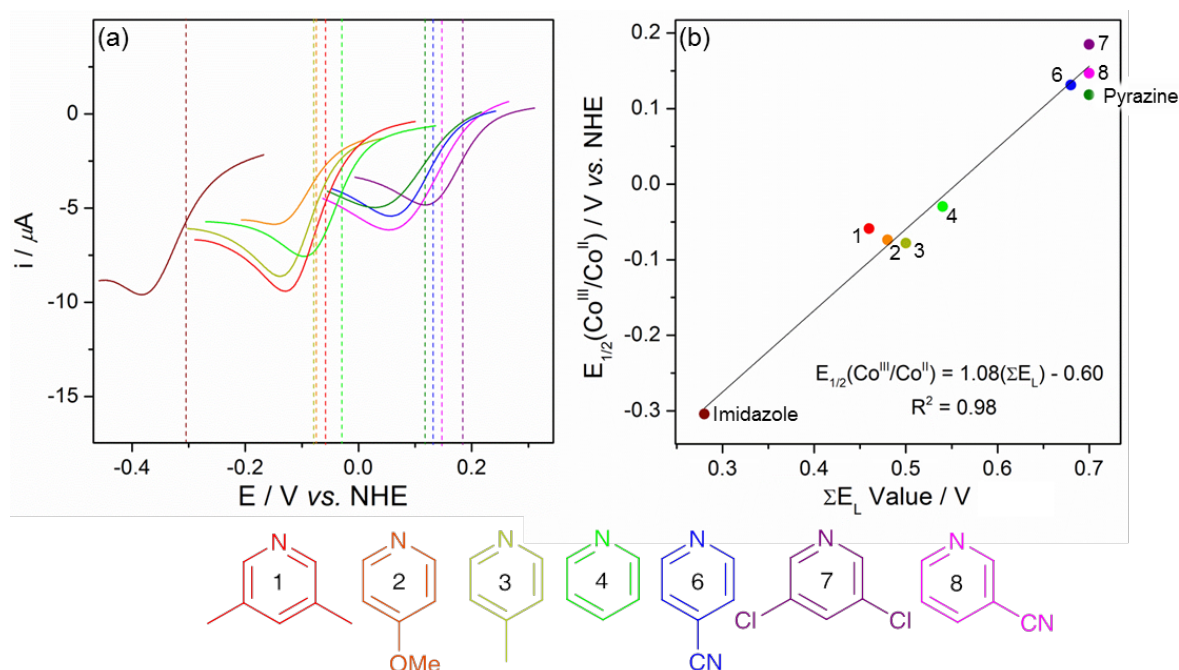

**Figure S8.** (a) LSVs of the  $\text{Co}^{\text{III}}/\text{Co}^{\text{II}}$  reduction waves (cathodic sweep) of assembled cobaloximes depicted in Figures 3 and S6 (only cobaloximes with clear  $\text{Co}^{\text{III}}/\text{Co}^{\text{II}}$  redox waves were used). (b) Correlation between  $\Sigma E_L$  and the  $E_{1/2}$  of the  $\text{Co}^{\text{III}}/\text{Co}^{\text{II}}$  redox wave. Calculation of  $\Sigma E_L = 2 \times (\text{Axial ligand } E_L) + 4 \times (\text{dmgh}^- E_L)$ .  $E_L$  of  $\text{dmgh}^-$  was reported as  $0.01 \text{ V}^2$ .

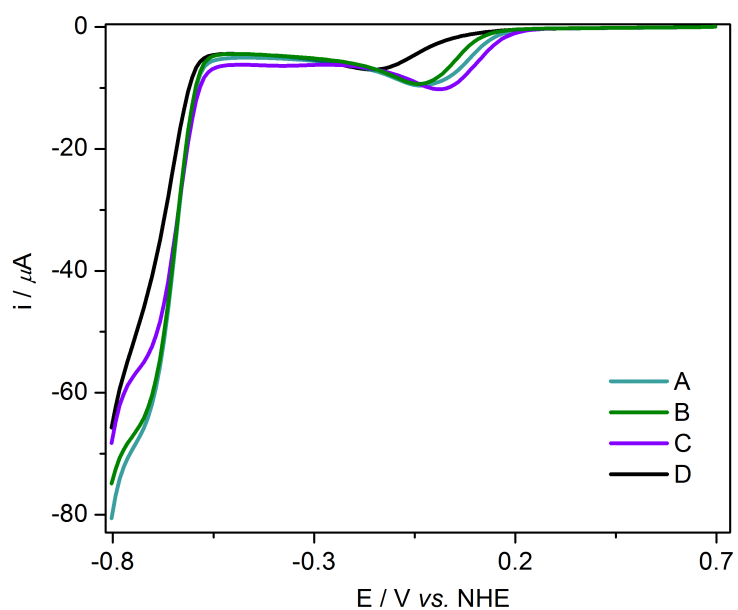

**Figure S9.** LSVs of the isolated cobaloximes **A** to **D** (1 mM) in an aqueous TEOA/Na<sub>2</sub>SO<sub>4</sub> solution (9 mL, 0.1 M each, pH 7) with acetone (1 mL) at 100 mV s<sup>-1</sup>.

## References.

1. G. N. Schrauzer, G. W. Parshall, and E. R. Wonchoba, *Inorganic Syntheses*, John Wiley & Sons, Inc., Hoboken, NJ, USA, 1968, vol. 11.
2. A. B. P. Lever, *Inorg. Chem.*, 1990, **29**, 1271–1285.
